# Supplementary material for: Evolutionary Analysis of StSnRK2 Family Genes and Their Overexpression in Transgenic Tobacco Improve Drought Tolerance
Source: MDPI journal article supplement (doi:10.3390/ijms24021000), 2023-01-05
Supplement: s1 [file s1]

**Table S1.** Correlation analysis of *StSnRK2* genes expression and physical properties following PEG treatment

| Correlation coefficient | <i>StSnRK2.1</i> | <i>StSnRK2.2</i> | <i>StSnRK2.3</i> | <i>StSnRK2.4</i> | <i>StSnRK2.5</i> | <i>StSnRK2.6</i> | <i>StSnRK2.7</i> | <i>StSnRK2.8</i> |
|-------------------------|------------------|------------------|------------------|------------------|------------------|------------------|------------------|------------------|
| Chlorophyll             | -0.495           | -0.488           | -0.418           | -0.507           | -0.206           | -0.264           | -0.447           | -0.100           |
| Proline                 | 0.650**          | 0.351            | 0.720**          | 0.495            | 0.423            | 0.641*           | 0.609*           | -0.017           |
| MDA                     | 0.661**          | 0.188            | 0.405            | 0.686**          | -0.047           | 0.268            | 0.462            | -0.101           |
| CAT                     | 0.231            | 0.419            | 0.497            | 0.615*           | 0.412            | 0.396            | 0.354            | 0.252            |
| SOD                     | 0.433            | 0.507            | 0.514*           | 0.494            | 0.395            | 0.370            | 0.443            | 0.188            |

**Table S2.** Correlation analysis of *StSnRK2* gene expression and physical properties following PEG treatment

| Correlation coefficient | <i>StSnRK2.1</i> | <i>StSnRK2.2</i> | <i>StSnRK2.3</i> | <i>StSnRK2.4</i> | <i>StSnRK2.5</i> | <i>StSnRK2.6</i> | <i>StSnRK2.7</i> | <i>StSnRK2.8</i> |
|-------------------------|------------------|------------------|------------------|------------------|------------------|------------------|------------------|------------------|
| Proline                 | 0.888**          | -0.143           | 0.898**          | 0.911**          | -0.249           | 0.958**          | 0.239            | -0.619*          |
| MDA                     | 0.732**          | 0.623*           | 0.811**          | 0.476            | -0.697*          | 0.534            | 0.071            | -0.266           |
| IL                      | 0.552            | 0.855**          | 0.571            | 0.198            | -0.812*          | 0.222            | -0.021           | 0.007            |
| SOD                     | 0.941**          | 0.252            | 0.913**          | 0.814**          | -0.571           | 0.840**          | 0.139            | -0.410           |
| POD                     | 0.887**          | 0.312            | 0.914**          | 0.726**          | -0.562           | 0.776**          | 0.121            | 0.113            |
| CAT                     | 0.599*           | 0.832**          | 0.55             | 0.270            | -0.876           | 0.263            | -0.067           | 0.113            |

**Table S3** The sequences of primers were used for *StSnRK2s* in qRT-PCR

| Gene             | Sequences                                                                  |
|------------------|----------------------------------------------------------------------------|
| <i>StSnRK2.1</i> | F: 5'- CAATGTGCCGATGTAAATAACCC-3'<br>R: 5'- CCCATAAGAATGTGCTCCAACC-3'      |
| <i>StSnRK2.2</i> | F: 5'-TACCTGGAGTAGTGTCA-3'<br>R: 5'-AAGTCATTGCTGCTGTC-3'                   |
| <i>StSnRK2.3</i> | F: 5'-ACCAGTTTGAGGAGCCA-3'<br>R: 5'-ATATCGAGGTCAGGATC-3'                   |
| <i>StSnRK2.4</i> | F: 5'-TTCCCGTTCAGTATCAG-3'<br>R: 5'-TTCTTCATCCTCCTCCT-3'                   |
| <i>StSnRK2.5</i> | F: 5'- ATAGTGAAGAAAAGCCATTACAAAG-3'<br>R: 5'- TCTCATCATCTAAATCAGCATCAGT-3' |
| <i>StSnRK2.6</i> | F: 5'-GACAATCCAACATTCTCCCTTCA-3'<br>R: 5'- TGATGGAGGTGCTGGATTCTT-3'        |
| <i>StSnRK2.7</i> | F: 5'- GGAAGAAGGACGGAATGAGTG-3'<br>R: 5'- ATGCCTTGAGATGAACTTGCT-3'         |
| <i>StSnRK2.8</i> | F: 5'-GGCCCCAAAGGTTGTGAT-3'<br>R: 5'-AAATTCCCCACTTGTCT-3'                  |

|             |                               |
|-------------|-------------------------------|
| <i>ef1a</i> | F: 5'-CAAGGATGACCCAGCCAAG-3'  |
|             | R: 5'-TTCCTTACCTGAACGCCTGT-3' |

**Table S4.** The sequences of primers were used for qRT-PCR in transgenic tobacco.

| Gene            | Sequences                                                 |
|-----------------|-----------------------------------------------------------|
| <i>NtCBL3</i>   | F: 5'- GTGGTTGCTACCCTTG-3'<br>R: 5'- GCTCCATTCCTCCTTAT-3' |
| <i>NtERD10A</i> | F: 5'-GGACAAGATTAAGGAGAA-3'<br>R: 5'-TGGTGGCCAGGAAG-3'    |
| <i>NtERD10B</i> | F: 5'-ATGCTCCACCGTTCTG-3'<br>R: 5'-TGATGATGCTCCCCTT-3'    |
| <i>NtERD10C</i> | F: 5'-AGAAATACGAGGAAACAG-3'<br>R: 5'-TCTTGTCCAAAAATCCC-3' |
